# Supplementary material for: The ultrasonic-assisted growth of porous cobalt/nickel composite hydroxides as a super high-energy and stable cathode for aqueous zinc batteries
Source: Royal Society of Chemistry journal article supplement (doi:10.1039/d0ta05941b), 2020-01-01
Supplement: d0ta05941b1.pdf [file d0ta05941b1.pdf]

## Supporting Information

### **Ultrasonic-assisted growth of porous cobalt/nickel composite hydroxides as super high-energy and stable cathode for aqueous zinc batteries**

Yafei Cheng,<sup>a</sup> Dezhou Zheng,<sup>b</sup> Wei Xu,<sup>b</sup> Hongbo Geng<sup>\*a</sup> and Xihong Lu<sup>\*b,c</sup>

<sup>a</sup> School of Materials Engineering, Changshu Institute of Technology, Changshu, Jiangsu 215500, China.

<sup>b</sup> School of Applied Physics and Materials, Wuyi University, Jiangmen, Guangdong 529020, China.

<sup>c</sup> MOE of the Key Laboratory of Bioinorganic and Synthetic Chemistry, The Key Lab of Low-Carbon Chem & Energy Conservation of Guangdong Province, School of Chemistry, Sun Yat-Sen University, Guangzhou 510275, China.

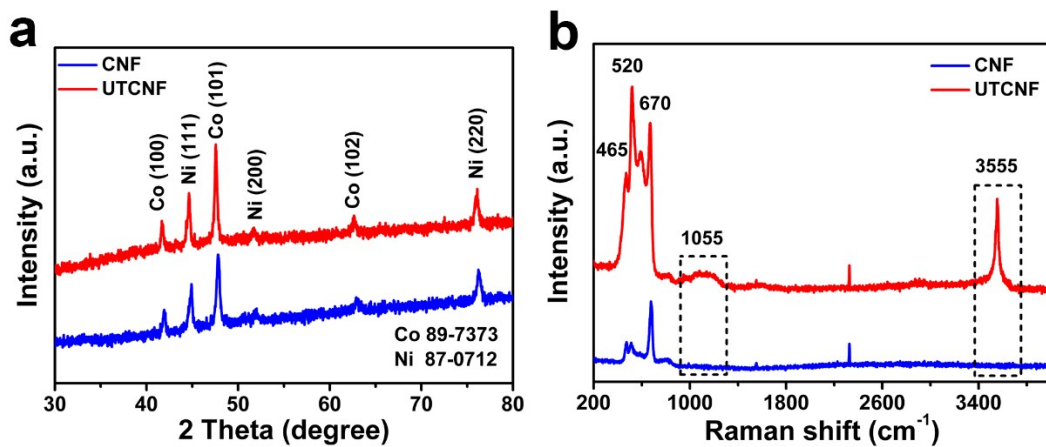

Fig. S1. XRD and Raman characterization. (a) XRD patterns and (b) Raman spectra.

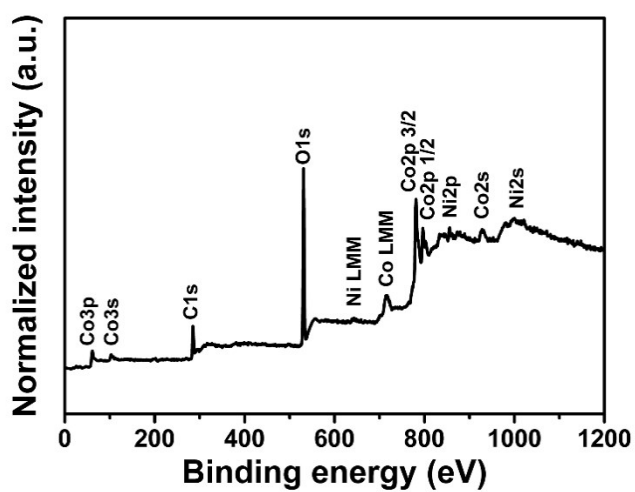

Fig. S2. Survey XPS spectra of UTCNF.

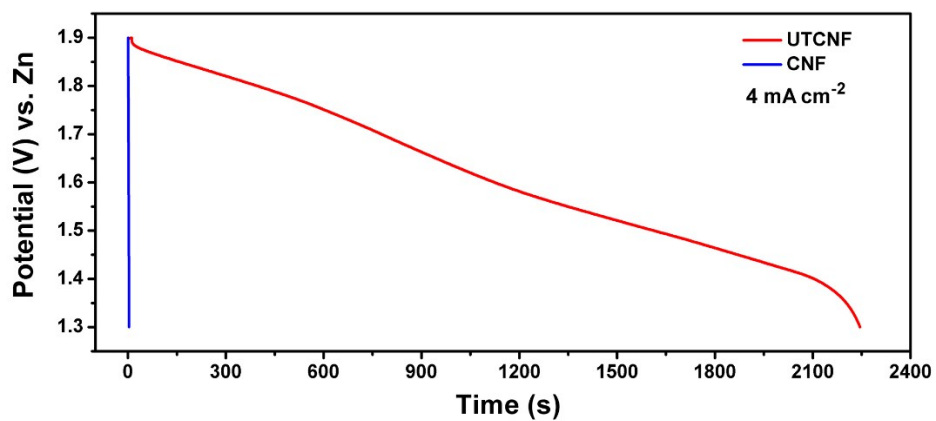

**Fig. S3.** GCD curves of CNF//Zn and UTCNF//Zn batteries at  $4 \text{ mA cm}^{-2}$ .

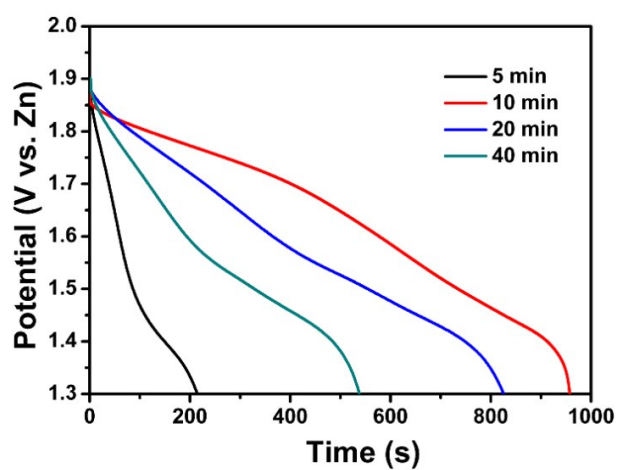

**Fig. S4.** GCD curves of UTCNF//Zn batteries at current density of  $8 \text{ mA cm}^{-2}$  using UTCNF electrodes with different ultrasonic treatment time.

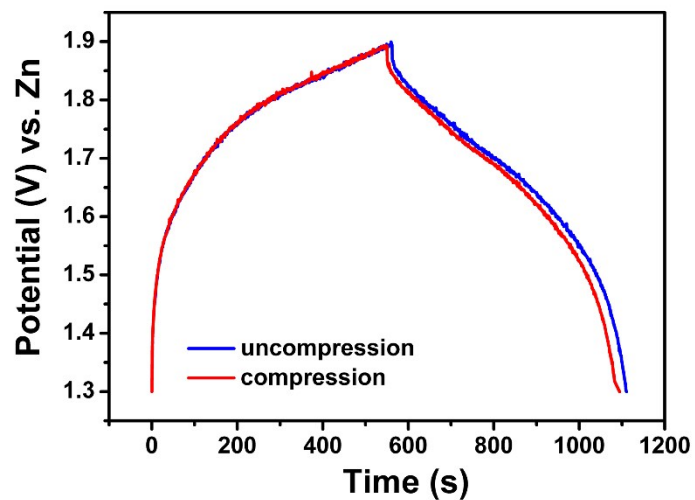

Fig. S5. The capacity performance of UTCNF with and without compression.

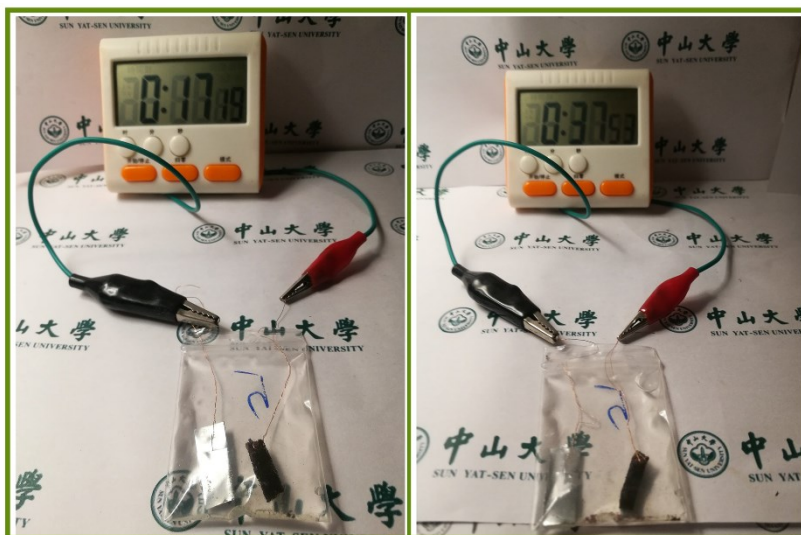

Fig. S6. The photograph of a timer lightened by the soft-package battery.

**Table S1.** The comparison of the capacity and stability of our UTCNF//Zn battery with other different aqueous batteries.

| <b>Battery</b>                  | <b>Capacity</b>                                            | <b>Stability</b>                      | <b>Ref.</b> |
|---------------------------------|------------------------------------------------------------|---------------------------------------|-------------|
| Ni <sub>2</sub> P//Zn           | 0.12 mAh·cm <sup>-2</sup> at<br>0.5 mA·cm <sup>-2</sup>    | ~ 80% retention after<br>1500 cycles  | 1           |
| Zn-Co                           | 0.71 mAh·cm <sup>-2</sup> at<br>1 mA·cm <sup>-2</sup>      | 71.1% retention after<br>5000 cycles  | 2           |
| Ni//Bi                          | 1.79 mAh·cm <sup>-2</sup> at<br>4 mA·cm <sup>-2</sup>      | 94% retention after<br>5000 cycles    | 3           |
| NiAlCo LDH//Zn                  | ~ 0.59 mAh·cm <sup>-2</sup> at<br>11.1 mA·cm <sup>-2</sup> | ~94% retention after<br>2000 cycles   | 4           |
| NH <sup>4+</sup> ion battery    | 0.31 mAh·cm <sup>-2</sup> at<br>0.45 mA·cm <sup>-2</sup>   | 67% retention after<br>1000 cycles    | 5           |
| SANF//Zn battery                | 0.42 mAh·cm <sup>-2</sup> at<br>0.8 mA·cm <sup>-2</sup>    | 92.5% retention after<br>1800 cycles  | 6           |
| Ni-NiO//Zn battery              | --                                                         | 96.6% retention after<br>10000 cycles | 7           |
| Co-Ni(OH) <sub>2</sub> //NNA@Zn | --                                                         | ~90% retention after<br>5000 cycles   | 8           |

**Table S2.** The comparison of the energy and power densities of our UTCNF//Zn battery with other energy store devices.

| <b>Battery</b>                              | <b>Energy Density</b>       | <b>Power Density</b>     | <b>Ref.</b> |
|---------------------------------------------|-----------------------------|--------------------------|-------------|
| SANF//Zn                                    | 0.75 mWh·cm <sup>-2</sup>   | 69.6 mW·cm <sup>-2</sup> | 6           |
| Co-Ni(OH) <sub>2</sub> //NNA@Zn             | 0.15 mWh·cm <sup>-2</sup>   | 1.73 mW·cm <sup>-2</sup> | 8           |
| Zn//NiCoO <sub>3</sub> H <sub>x</sub>       | 0.12 mWh·cm <sup>-2</sup>   | 32.8 mW·cm <sup>-2</sup> | 9           |
| flexible MnO <sub>2</sub> //Zn              | 0.01 mWh·cm <sup>-2</sup>   | 7 mW·cm <sup>-2</sup>    | 10          |
| Ni@Ni(OH) <sub>2</sub> //Zn                 | 0.26 mWh·cm <sup>-2</sup>   | 1.73 mW·cm <sup>-2</sup> | 11          |
| PPy SC                                      | 0.033 mWh·cm <sup>-2</sup>  | 3.6 mW·cm <sup>-2</sup>  | 12          |
| CNT SC                                      | 0.0018 mWh·cm <sup>-2</sup> | 32 mW·cm <sup>-2</sup>   | 13          |
| 3D RuO <sub>2</sub> SC                      | 0.1 mWh·cm <sup>-2</sup>    | 9.87 mW·cm <sup>-2</sup> | 14          |
| grapheme fiber SC                           | 0.006 mWh·cm <sup>-2</sup>  | 0.19 mW·cm <sup>-2</sup> | 15          |
| Co <sub>3</sub> O <sub>4</sub> @NiV-LDH//Zn | 2.2 mWh·cm <sup>-2</sup>    | --                       | 16          |
| Zn//V <sub>2</sub> O <sub>5</sub>           | ~2.0 mWh·cm <sup>-2</sup>   | --                       | 17          |

**Table S3.** Values of the equivalent circuit parameters of UTCNF//Zn and CNF//Zn batteries.

| Element  | CNF//Zn            |        | UTCNF//Zn          |        |
|----------|--------------------|--------|--------------------|--------|
|          | Value ( $\Omega$ ) | Error% | Value ( $\Omega$ ) | Error% |
| $R_s$    | 1.29               | 1.8    | 1.31               | 2.1    |
| $R_{ct}$ | 2.4                | 2.3    | 4.1                | 3.2    |
| $Z_w$    | 6.15               | 1.6    | 8.90               | 1.7    |

## References

- [1] J. Wen, Z. Feng, H. R. Liu, T. Che, Y. Q. Yang, S. Z. Li, S. Sheng and G. J. Fang, *Appl. Surf. Sci.*, 2019, **485**, 462-467.
- [2] M. Li, J. S. Meng, Q. Li, M. Huang, X. Liu, K. A. Owusu, Z. Liu and L. Q. Mai, *Adv. Funct. Mater.*, 2018, **28**, 1802016.
- [3] Y. X. Zeng, Z. Q. Lin, Z. F. Wang, M. M. Wu, Y. X. Tong and X. H. Lu, *Adv. Mater.*, 2018, **30**, 1707290.
- [4] M. Gong, Y. G. Li, H. B. Zhang, B. Zhang, W. Zhou, J. Feng, H. L. Wang, Y. Y. Liang, Z. J. Fan, J. Liu and H. J. Dai, *Energy Environ. Sci.*, 2014, **7**, 2025-2032.
- [5] X. Y. Wu, Y. T. Qi, J. J. Hong, Z. F. Li, A. S. Hernandez and X. L. Ji, *Angew. Chem. Int. Ed.*, 2017, **56**, 13026-13030.
- [6] R. Wang, Y. Han, Z. F. Wang, J. X. Jiang, Y. X. Tong and X. H. Lu, *Adv. Funct. Mater.*, 2018, **28**, 1802157.
- [7] Y. X. Zeng, Y. Meng, Z. Z. Lai, X. Y. Zhang, M. H. Yu, P. P. Fang, M. M. Wu, Y. X. Tong and X. H. Lu, *Adv. Mater.*, 2017, **29**, 1702698.
- [8] C. Xu, J. Liao, C. Yang, R. Z. Wang, D. Wu, P. C. Zou, Z. Y. Lin, B. H. Li, F. Y. Kang and C. P. Wong, *Nano Energy*, 2016, **30**, 900-908.
- [9] Y. Huang, W. S. Ip, Y. Y. Lau, J. F. Sun, J. Zeng, N. S. S. Yeung, W. S. Ng, H. F. Li, Z. X. Pei, Q. Xue, Y. K. Wang, J. Yu, H. Hu and C. Y. Zhi, *ACS Nano*, 2017, **11**, 8953-8961.
- [10] Y. X. Zeng, X. Y. Zhang, Y. Meng, M. H. Yu, J. N. Yi, Y. Q. Wu, X. H. Lu and Y. X. Tong, *Adv. Mater.*, 2017, **29**, 1700274.
- [11] Z. M. Hao, L. Xu, Q. Liu, W. Yang, X. B. Liao, J. S. Meng, X. F. Hong, L. He and L. Q. Mai, *Adv. Funct. Mater.*, 2019, **29**, 1808470.
- [12] L. Y. Yuan, B. Yao, B. Hu, K. F. Huo, W. Chen and J. Zhou, *Energy Environ. Sci.*, 2013, **6**, 470-476.
- [13] J. Ren, W. Y. Bai, G. Z. Guan, Y. Zhang and H. S. Peng, *Adv. Mater.*, 2013, **25**, 5965-5970.
- [14] A. Ferris, S. Garbarino, D. Guay and D. Pech, *Adv. Mater.*, 2015, **27**, 6625.
- [15] Y. N. Meng, Y. Zhao, C. G. Hu, H. H. Cheng, Y. Hu, Z. P. Zhang, G. Q. Shi and L. T. Qu, *Adv. Mater.*, 2013, **25**, 2326-2331.
- [16] S. Y. Wang, S. B. Lai, P. S. Li, T. F. Gao, K. Sun, X. T. Ding, T. H. Xie, C. Wu, X. J. Li,



Y. Kuang, W. Liu, W. M. Yang and X. M. Sun, *J. Power Sources*, 2019, **436**, 226867.

[17] M. Yan, P. He, Y. Chen, S. Wang, Q. Wei, K. Zhao, X. Xu, Q. An, Y. Shuang, Y. Shao,

K. T. Mueller, L. Mai, J. Liu and J. Yang, *Adv. Mater.*, 2018, **30**, 1703725.
